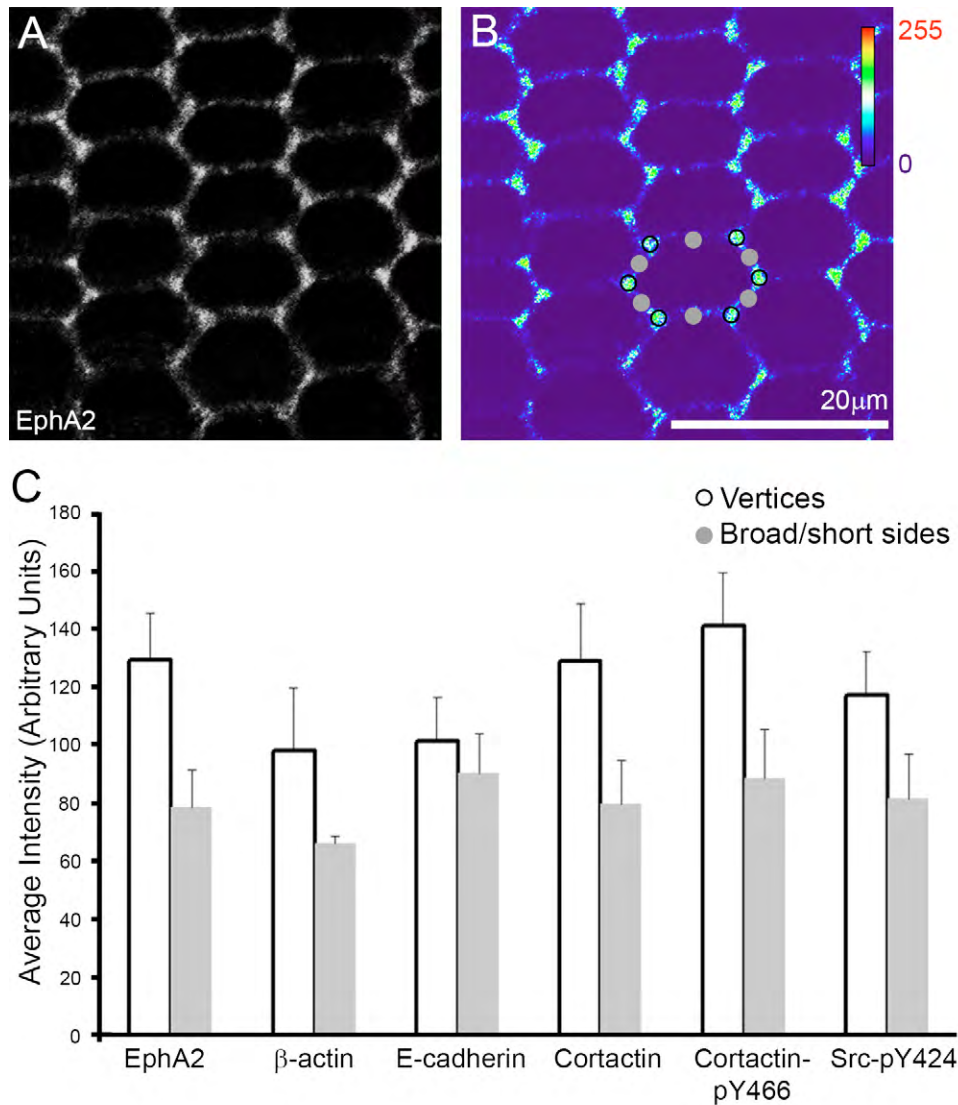

**Fig S1. Intensity measurement of immunofluorescence signals between the vertices and edges of hexagonal WT equatorial epithelial cells.** A) Immunostaining of EphA2 in WT flat-mounted equatorial epithelial cells. B) A heat map of the EphA2 immunostaining signal (A) was generated in ImageJ using the HeatMap Histogram plug-in. The intensity of the immunofluorescence is pseudo-colored between purple (0) and red (255). Intensity was measured at all 6 vertices (open black circles) and at all 6 sides (grey circles) for three individual cells per image. The process was repeated for three different staining samples for each antibody, and a total of 9 cells were analyzed for each antibody. C) The average and standard deviation of the intensity of immunofluorescence for each antibody was plotted in Excel. The open black bars represent the vertices of the cells, while the grey bars represent the broad/short sides. The difference between the intensity at the vertices versus the edges is statistically significant ( $P < 0.001$ ) for all antibodies, except E-cadherin.
